# Supplementary material for: Phylogenetic Analysis of Nucleus-Encoded Acetyl-CoA Carboxylases Targeted at the Cytosol and Plastid of Algae
Source: PubMed Central journal article supplement (PMC4489017; doi:10.1371/journal.pone.0131099), 2015-07-01
Supplement: pone.0131099.s001.pdf [file pone.0131099.s001.pdf]

**S1 Table. Homomeric ACCase sequence details.** Species names, taxonomy, protein identification, size, identification numbers and sources of sequences used for the phylogenetic analysis of homomeric ACCase.

| Species                                      | Taxonomy           | Protein | Size  | Identification | Source        |
|----------------------------------------------|--------------------|---------|-------|----------------|---------------|
| <i>Toxoplasma gondii</i>                     | Apicomplexa        | ACC1    | 2564  | AAF04493       | NCBI          |
| <i>Toxoplasma gondii</i>                     | Apicomplexa        | ACC2    | 1102  | AAF04494       | NCBI          |
| <i>Toxoplasma gondii</i> (GT1)               | Apicomplexa        | ACCcase | 2252  | EEE20751       | NCBI          |
| <i>Toxoplasma gondii</i> (ME49)              | Apicomplexa        | ACC1    | 2599  | XP_002369961   | NCBI          |
| <i>Toxoplasma gondii</i> (ME49)              | Apicomplexa        | ACC2    | 3399  | XP_002370640   | NCBI          |
| <i>Toxoplasma gondii</i> (VEG)               | Apicomplexa        | ACC1    | 2612  | EEE30125       | NCBI          |
| <i>Toxoplasma gondii</i> (VEG)               | Apicomplexa        | ACC2    | 3373  | EEE28725       | NCBI          |
| <i>Cyclotella cryptica</i>                   | Bacillariophyceae  | ACCcase | 2089  | AAA81471       | NCBI          |
| <i>Fragilariopsis cylindrus</i> (CCMP1102)   | Bacillariophyceae  | ACCcase | 2045  | 274583         | JGI           |
| <i>Fragilariopsis cylindrus</i> (CCMP1102)   | Bacillariophyceae  | ACCcase | 2302  | 145710         | JGI           |
| <i>Phaeodactylum tricorutum</i>              | Bacillariophyceae  | ACCcase | 2093  | 54926          | JGI           |
| <i>Phaeodactylum tricorutum</i>              | Bacillariophyceae  | ACCcase | 2283  | 55209          | JGI           |
| <i>Thalassiosira pseudonana</i>              | Bacillariophyceae  | ACCcase | 2089  | 6770           | JGI           |
| <i>Thalassiosira pseudonana</i>              | Bacillariophyceae  | ACCcase | 2251  | 12234          | JGI           |
| <i>Arabidopsis thaliana</i>                  | Brassicaceae       | ACC1    | 2254  | NP_174849      | NCBI          |
| <i>Arabidopsis thaliana</i>                  | Brassicaceae       | ACC2    | 2356  | NP_174850      | NCBI          |
| <i>Physcomitrella patens patens</i>          | Bryophyte          | ACCcase | 2238  | EDQ80874       | NCBI          |
| <i>Physcomitrella patens patens</i>          | Bryophyte          | ACCcase | 2249  | EDQ62113       | NCBI          |
| <i>Bigeloviella natans</i>                   | Chlorarachniophyta | ACC1    | 2031  | 92488          | JGI           |
| <i>Bigeloviella natans</i>                   | Chlorarachniophyta | ACC2    | 2053  | 18464          | JGI           |
| <i>Bathycoccus prasinos</i>                  | Chlorophyta        | ACCcase | 2120  | CCO17834       | NCBI          |
| <i>Bathycoccus prasinos</i>                  | Chlorophyta        | ACCcase | 2177  | CCO18633       | NCBI          |
| <i>Chlorella</i> sp. (NC64A)                 | Chlorophyta        | ACCcase | 1868  | 56737          | JGI           |
| <i>Micromonas pusilla</i> (CCMP1545)         | Chlorophyta        | ACCcase | 2146  | 31755          | JGI           |
| <i>Micromonas pusilla</i> (CCMP1545)         | Chlorophyta        | ACCcase | 2094  | 16401          | JGI           |
| <i>Micromonas</i> sp. (RCC2999)              | Chlorophyta        | ACCcase | 2140  | 113382         | JGI           |
| <i>Micromonas</i> sp. (RCC2999)              | Chlorophyta        | ACCcase | 2190  | 104872         | JGI           |
| <i>Ostreococcus lucimarinus</i>              | Chlorophyta        | ACCcase | 2013  | 44400          | JGI           |
| <i>Ostreococcus lucimarinus</i>              | Chlorophyta        | ACCcase | 1994  | 11             | JGI           |
| <i>Ostreococcus</i> sp. (RCC809)             | Chlorophyta        | ACCcase | 2014  | 61393          | JGI           |
| <i>Ostreococcus</i> sp. (RCC809)             | Chlorophyta        | ACCcase | 2060  | 36970          | JGI           |
| <i>Ostreococcus tauri</i>                    | Chlorophyta        | ACCcase | 2123  | CAL50235       | NCBI          |
| <i>Ostreococcus tauri</i>                    | Chlorophyta        | ACCcase | 1983  | CAL56314       | NCBI          |
| <i>Volvox carteri</i> f. <i>nagariensis</i>  | Chlorophyta        | ACCcase | 2462  | 106840         | JGI           |
| <i>Chromera velia</i>                        | Chromerida         | ACC1    | 2082  | KF673098       | Present study |
| <i>Chromera velia</i>                        | Chromerida         | ACC2    | -     | KF673095-7     | Present study |
| <i>Guillardia theta</i>                      | Cryptophyta        | ACC1    | 2055  | 68771          | JGI           |
| <i>Guillardia theta</i>                      | Cryptophyta        | ACC2    | 2171  | 72035          | JGI           |
| <i>Nannochloropsis gaditana</i>              | Eustigmatophyceae  | ACC1    | 2139  | AFJ69228       | NCBI          |
| <i>Nannochloropsis oculata</i>               | Eustigmatophyceae  | ACC1    | 2,317 | KF673100       | Present study |
| <i>Nannochloropsis oculata</i>               | Eustigmatophyceae  | ACC2    | 2,362 | KF673101       | Present study |
| <i>Emiliana huxleyi</i> (1516)               | Haptophyta         | ACCcase | 1577  | 455280         | JGI           |
| <i>Emiliana huxleyi</i> (1516)               | Haptophyta         | ACCcase | 2013  | 449545         | JGI           |
| <i>Isochrysis</i> aff. <i>galbana</i> (TISO) | Haptophyta         | ACC1    | 2134  | KF673099       | Present study |
| <i>Phytophthora infestans</i> (T30-4)        | Heterokontophyta   | ACC     | 2326  | EEY68805       | NCBI          |
| <i>Phytophthora sojae</i>                    | Heterokontophyta   | ACC     | 2310  | EGZ09435       | NCBI          |
| <i>Aureococcus anophagefferens</i> (1984)    | Pelagophyceae      | ACCcase | 1809  | 38836          | JGI           |
| <i>Aureococcus anophagefferens</i> (1984)    | Pelagophyceae      | ACCcase | 2153  | 65524          | JGI           |
| <i>Ectocarpus siliculosus</i>                | Phaeophyta         | ACCcase | 1848  | Esi0198_0003   | BOGAS         |
| <i>Ectocarpus siliculosus</i>                | Phaeophyta         | ACCcase | 799   | Esi0592_0001   | BOGAS         |

| <b>Species</b>                 | <b>Taxonomy</b> | <b>Protein</b> | <b>Size</b> | <b>Identification</b> | <b>Source</b> |
|--------------------------------|-----------------|----------------|-------------|-----------------------|---------------|
| <i>Ectocarpus siliculosus</i>  | Phaeophyta      | ACCase         | 1049        | Esi0367_0023          | BOGAS         |
| <i>Ectocarpus siliculosus</i>  | Phaeophyta      | ACCase         | 166         | Esi0403_0027          | BOGAS         |
| <i>Aegilops tauschii</i>       | Poaceae         | ACC2           | 2258        | ACD46664              | NCBI          |
| <i>Aegilops tauschii</i>       | Poaceae         | ACC1           | 2311        | ACD46679              | NCBI          |
| <i>Triticum urartu</i>         | Poaceae         | ACC2           | 2260        | ACD46670              | NCBI          |
| <i>Triticum urartu</i>         | Poaceae         | ACC1           | 2311        | ACD46677              | NCBI          |
| <i>Cyanidioschyzon merolae</i> | Rhodophyta      | ACCase         | 2719        | CMM188C               | CMGP          |
| <i>Galdieria sulphuraria</i>   | Rhodophyta      | ACC2           | 2482        | EME32530              | NCBI          |

**Supplemental table 2  $\beta$ -carboxyltransferase subunit of heteromeric ACCase** Species names, taxonomy, protein identification, size, identification numbers and sources of sequences used for the phylogenetic analysis of the  $\beta$ -carboxyltransferase subunit of heteromeric ACCase.

| Species                                           | Taxonomy       | Protein     | Size | Identification | Source |
|---------------------------------------------------|----------------|-------------|------|----------------|--------|
| <i>Escherichia coli</i> (K12)                     | Bacteria       | $\beta$ -CT | 304  | P0A9Q5         | NCBI   |
| <i>Arabidopsis thaliana</i>                       | Brassicaceae   | $\beta$ -CT | 488  | P56765         | NCBI   |
| <i>Auxenochlorella protothecoides</i>             | Chlorophyta    | $\beta$ -CT | 388  | AEU08409       | NCBI   |
| <i>Bryopsis hypnoides</i>                         | Chlorophyta    | $\beta$ -CT | 353  | ACX33787       | NCBI   |
| <i>Chara vulgaris</i>                             | Chlorophyta    | $\beta$ -CT | 293  | ABA61965       | NCBI   |
| <i>Chlorococcum humicola</i>                      | Chlorophyta    | $\beta$ -CT | 337  | ADZ15145.1     | NCBI   |
| <i>Chlamydomonas reinhardtii</i>                  | Chlorophyta    | $\beta$ -CT | 369  | 133238         | JGI    |
| <i>Chlorella variabilis</i>                       | Chlorophyta    | $\beta$ -CT | 388  | ADZ04992       | NCBI   |
| <i>Chlorella vulgaris</i>                         | Chlorophyta    | $\beta$ -CT | 411  | BAA57908       | NCBI   |
| <i>Coccomyxa subellipsoidea</i> (C-169)           | Chlorophyta    | $\beta$ -CT | 628  | ADV29875       | NCBI   |
| <i>Dunaliella salina</i>                          | Chlorophyta    | $\beta$ -CT | 349  | ABO33321       | NCBI   |
| <i>Helicosporidium</i> sp.                        | Chlorophyta    | $\beta$ -CT | 471  | ABD33968       | NCBI   |
| <i>Leptosira terrestris</i>                       | Chlorophyta    | $\beta$ -CT | 599  | ABO69279       | NCBI   |
| <i>Nephroselmis olivacea</i>                      | Chlorophyta    | $\beta$ -CT | 627  | AF137379_28    | NCBI   |
| <i>Oltmannsiellopsis viridis</i>                  | Chlorophyta    | $\beta$ -CT | 342  | ABB81983       | NCBI   |
| <i>Oocystis solitaria</i>                         | Chlorophyta    | $\beta$ -CT | 411  | ACQ90742       | NCBI   |
| <i>Parachlorella kessleri</i>                     | Chlorophyta    | $\beta$ -CT | 441  | ACQ90907       | NCBI   |
| <i>Pedinomonas minor</i>                          | Chlorophyta    | $\beta$ -CT | 381  | ACQ90825       | NCBI   |
| <i>Pseudendoclonium akinetum</i>                  | Chlorophyta    | $\beta$ -CT | 312  | AAV80676       | NCBI   |
| <i>Trebouxia aggregata</i>                        | Chlorophyta    | $\beta$ -CT | 515  | ABX82657       | NCBI   |
| <i>Trebouxiophyceae</i> sp.                       | Chlorophyta    | $\beta$ -CT | 622  | AFQ93852       | NCBI   |
| <i>Volvox carteri</i> f. <i>nagariensis</i>       | Chlorophyta    | $\beta$ -CT | 478  | 82311          | JGI    |
| <i>Anabaena variabilis</i> (ATCC 29413)           | Cyanobacteria  | $\beta$ -CT | 316  | YP_320706      | NCBI   |
| <i>Microcystis aeruginosa</i> NIES-843            | Cyanobacteria  | $\beta$ -CT | 316  | BAG05575       | NCBI   |
| <i>Nostoc azollae</i> (0708)                      | Cyanobacteria  | $\beta$ -CT | 317  | ZP_03766652    | NCBI   |
| <i>Huperzia lucidula</i>                          | Lycopodiophyta | $\beta$ -CT | 316  | AAT80716       | NCBI   |
| <i>Paulinella chromatophora</i>                   | Rhizaria       | $\beta$ -CT | 288  | ACB42560       | NCBI   |
| <i>Cyanidium caldarium</i>                        | Rhodophyta     | $\beta$ -CT | 267  | Q9TLW3         | NCBI   |
| <i>Cyanidioschyzon merolae</i>                    | Rhodophyta     | $\beta$ -CT | 273  | CMV207C        | CMGP   |
| <i>Galdieria sulphuraria</i>                      | Rhodophyta     | $\beta$ -CT | 549  | EME28527       | NCBI   |
| <i>Gracilaria tenuistipitata</i> var. <i>liui</i> | Rhodophyta     | $\beta$ -CT | 293  | AAT79592       | NCBI   |
| <i>Porphyra purpurea</i>                          | Rhodophyta     | $\beta$ -CT | 288  | P51198         | NCBI   |
| <i>Porphyra umbilicalis</i>                       | Rhodophyta     | $\beta$ -CT | 288  | AFC39868       | NCBI   |
| <i>Porphyra yezoensis</i>                         | Rhodophyta     | $\beta$ -CT | 288  | Q1XDT9         | NCBI   |
| <i>Chaetosphaeridium globosum</i>                 | Streptophyta   | $\beta$ -CT | 297  | AAM96498       | NCBI   |
| <i>Chlorokybus atmophyticus</i>                   | Streptophyta   | $\beta$ -CT | 296  | ABM87949       | NCBI   |
| <i>Staurastrum punctulatum</i>                    | Streptophyta   | $\beta$ -CT | 307  | AAX45681       | NCBI   |
| <i>Zygnema circumcarinatum</i>                    | Streptophyta   | $\beta$ -CT | 297  | AAX45794       | NCBI   |
